# Supplementary material for: 1-Alkyl-3-methylbenzotriazolium salts: ionic solvents and electrolytesElectronic supplementary information (ESI) available: complete experimental procedures and spectroscopic data for all compounds prepared. See http://www.rsc.org/suppdata/jm/b3/b307931g/
Source: Royal Society of Chemistry journal article supplement (doi:10.1039/b307931g), 2003-01-01
Supplement: b307931g.doc [file b307931g.doc]

## Electronic supplementary information for Forsyth *et al*. paper entitled “1-alkyl-3-methylbenzotriazolium salts: Ionic solvents and electrolytes”

Complete experimental procedures and spectroscopic data for all compounds prepared.

## *1-methylbenzotriazole MeBt*

Benzotriazole (50 g, 0.42 mol) was dissolved in a solution of sodium hydroxide (33.6 g, 0.84 mol) and water. Dimethyl sulfate (53 g, 0.42 mol) was added in one portion and the solution was stirred overnight at room temperature. The mixture was washed with 2N hydrochloric acid (A) and extracted with ethyl acetate (B). The acidic aqueous layer (A) was neutralised with sodium hydroxide and extracted with ethyl acetate. The ethyl acetate layer was then washed with brine, dried over magnesium sulfate and evaporated to dryness. Recrystallisation from hexane gave white needles of 1-methylbenzotriazole (65%). Melting point 60-62°C (Lit.,16 65°C). 1Hnmr (d6-DMSO):  4.30 (s, 3H, N-CH3), 7.37-7.41 (m, 1H, CH), 7.52-7.56 (m, 1H, CH), 7.81-7.84 (m, 1H, CH) 8.01-8.03 (m, 1H, CH). 13Cnmr (d6-DMSO):  34.0 (N-CH3) 110.4 (CH) 118.9 (CH) 123.7 (CH) 126.9 (CH) 133.3 (CH) 145.1 (CH). ES-MS: ES+ *m/z* 133.8 (M+1); 155.8 (M+Na).

The organic layer (B) separated from the acidic aqueous layer above was washed with brine, dried over magnesium sulfate and evaporated, to afford 2-methylbenzotriazole (35%). Boiling point 108-112°C at 22 mmHg (Lit.,16 103 - 104°C at 15 mmHg). 1Hnmr (d6-DMSO):  4.50 (s, 3H, N-CH3) 7.40-7.43 (m, 2H, CH) 7.88-7.91 (m, 2H, CH). 13Cnmr (d6-DMSO):  42.4 (CH3) 117.0 (CH)125.6 (CH) 143.3 (CH). ES-MS: ES+ *m/z* 133.8 (M+1).

## *1,3-dimethylbenzotriazolium iodide Bt11I*

Methyl iodide (2.13 g, 15.0 mmol) was added to a solution of 1-methylbenzotriazole (1.81 g, 13.6 mmol) in acetonitrile and refluxed overnight with stirring. The crude reaction mixture was triturated with ether and Bt11I was filtered then recrystallised from acetonitrile and ether (3.60 g, 96%). Melting point 183-185°C. Infrared (nujol): 3042m, 3017m, 1604w, 1398w, 1266w, 1117w, 1060w, 1014w, 779s, 752w, 722w cm-1. 1Hnmr (d6-DMSO):  4.59 (s, 6H, CH3), 7.99 (m, 2H, CH), 8.33 (m, 2H, CH). 13Cnmr (d6-DMSO):  38.9 (2xCH3), 113.4 (2xCH), 130.3 (2xCH), Quaternary carbons not observed. ES MS: ES+ m/z 148 Bt11+. ES- m/z 127 I-.

*1-ethyl-3-methylbenzotriazolium iodide Bt12I*

Ethyl iodide was used as the alkylating agent in analogous reaction to Bt11I. Melting point 137-139°C. Infrared (nujol): 3039w, 2727w, 1605w, 1473w, 1345m, 1280w, 1240w, 1198w, 1145w, 1114w, 1014w, 948w, 898w, 850w, 770s, 737w cm-1. 1Hnmr (d6-DMSO):  1.63-1.68 (t, 3H, CH3), 4.62 (s, 3H, N-CH3), 5.01-5.08 (q, 2H, N-CH2), 7.98-8.02 (m, 2H, CH), 8.36-8.44 (m, 2H, CH). 13Cnmr (d6-DMSO):  14.5 (CH3), 40.1 (N-CH3), 48.7 (N-CH2), 114.1 (CH) 114.5 (CH), 131.7 (CH), 131.8 (CH), 134.7 (C, ethyl side), 135.6 (C, methyl side). ES MS: ES+ m/z 162 Bt12. ES- m/z 127 I-.

*1-propyl-3-methylbenzotriazolium iodide Bt13I*

Propyl iodide was used as the alkylating agent in analogous reaction to Bt11I. Melting point 165-168°C. Infrared (nujol): 2727w, 1631w, 1604w, 1416w, 1342w, 1286w, 1261w, 1233w, 1182w, 1151w, 1128w, 1072w, 1015w, 935w, 892w, 860w, 801w, 770m, 721w cm-1. 1Hnmr (d6-DMSO):  0.94-0.99 (t, 3H, CH3), 2.00-2.11 (hex, 2H, CH2), 4.62 (s, 3H, N-CH3), 4.96-5.00 (t, 2H, N-CH2), 7.98-8.02 (m, 2H, CH), 8.34-8.42 (m, 2H, CH). 13Cnmr (d6-DMSO):  10.1 (CH3), 21.6 (CH2), 37.4 (N-CH3), 52.1 (N-CH2), 113.5 (2xCH), 130.3 (2xCH), Quaternary carbons not observed. ES MS: ES+ *m/z* 176 Bt13+. ES- *m/z* 127 I-.

*1-butyl-3-methylbenzotriazolium iodide Bt14I*

Butyl iodide was used as the alkylating agent in an analogous method to Bt11I. Melting point 98-100°C. Infrared (nujol): 3423br, 2920s, 2854s, 2727w, 2358w, 2137m, 1996w, 1811w, 1606m, 1462m, 1377m, 1344m, 1279m, 1241w, 1200w, 1115w, 1078w, 1049w, 1018w, 982w, 874w, 771w, 762m, 749m, 737w cm-1. 1Hnmr (d6-DMSO):  0.91-0.96 (t, 3H, CH3), 1.32-1.42 (sex, 2H, CH2), 1.96-2.07 (quintet, 2H, CH2) 4.62 (s, 3H, N-CH3), 4.99-5.04 (t, 2H, N-CH2) 7.97-8.03 (m, 2H, CH), 8.32-8.45 (m, 2H, CH). 13Cnmr (d6-DMSO):  12.7 (CH3), 18.4 (CH2), 30.0 (CH2), 37.4 (N-CH3), 50.4 (N-CH2), 113.2 (CH), 113.6 (CH), 130.2 (CH) 130.3 (CH), Quaternary carbons not observed. ES-MS: ES+ *m/z* 190 Bt14+. ES- *m/z* 127 I-.

*1-benzyl-3-methylbenzotriazolium bromide Bt1BnBr*

Benzyl bromide was used as the alkylating agent in an analogous method to Bt11I. Melting point 173°C. Infrared (nujol): 3424w, 3027w, 2925s, 2854s, 2359w, 1995w, 1604w, 1502w, 1495w, 1454m, 1405w, 1376m, 1338m, 1275m, 1207w, 1195w, 1156w, 1141w, 1087w, 1014w, 854w, 797w, 776m, 766s, 749m, 737m, 708m, 696w, 674w cm -1. 1Hnmr (d6-DMSO):  4.63 (s, 3H, N-CH3), 6.32 (s, 2H, N-CH2), 7.37-7.47 (m, 3H, CH), 7.52-7.56 (m, 2H, CH), 7.96-8.02 (m, 2H, CH), 8.35-8.42 (m, 2H, CH). 13Cnmr (d6-DMSO):  37.5 (N-CH3), 53.7 (N-CH2), 113.2 (CH), 113.9 (CH), 128.3 (CH) 128.5 (CH), 128.6 (CH), 130.3 (CH), 130.7 (CH), Quaternary carbons not observed. ES-MS: ES+ *m/z* 223.9 Bt1Bn+. ES- *m/z* 79,81 Br-.

*1-butyl-3-methylbenzotriazolium dicyanamide Bt14N(CN)2*

A solution of 1-butyl-3-methylbenzotriazolium iodide (6.34 g, 0.02 mol) in ethanol was added to a solution of silver dicyanamide (3.8 g, 0.022 mol) in ethanol and stirred at room temperature for several hours. Solid silver iodide was filtered and the ethanol removed by rotary evaporation. The residue was dissolved in methylene chloride and dried over magnesium sulphate, filtered and evaporated to dryness. The viscous clear liquid was then dried and stored in a vacuum desiccator (5.05 g, 99%). Infrared (Neat): 3486s br, 3102w, 3065m, 3009s, 2963m, 2936m, 2875m, 2359w, 2226s, 2190s, 2138s, 1817w, 1609m, 1504w, 1464m, 1403m, 1347m, 1306m, 1272m, 1206w, 1145m, 1116w, 1076w, 1021w, 1003w, 951w, 902m, 805w, 796m, 776m, 757m, 659w cm-1. 1Hnmr (d6-DMSO):  0.91-0.96 (t, 3H, CH3), 1.32-1.45 (sex, 2H, CH2), 1.96-2.06 (quin, 2H, CH2), 4.61 (s, 3H, N-CH3), 4.98-5.03 (t, 2H, N-CH2), 7.97-8.03 (m, 2H, CH), 8.32-8.44 (m, 2H, CH). 13Cnmr (d-6DMSO):  12.2 (CH3), 18.4 (CH2), 30.0 (CH2), 37.3 (N-CH3), 50.3 (N-CH2), 113.2 (CH), 130.3 (CH), 130.4 (CH), Quaternary carbons not observed. ES-MS: ES+ *m/z* 189.9 Bt14+. ES- *m/z* 65.5 N(CN)2-.

*1-butyl-3-methylbenzotriazolium bis(trifluoromethane)sulfonamide Bt14Ntf2*

A solution of 1-butyl-3-methylbenzotriazolium iodide (6.34 g, 0.02 mol) in water was added to a solution of lithium bis(trifluoromethane)sulfonamide (6.32 g, 0.022 mol) in water and stirred at room temperature for several hours. The mixture was transferred to a separating funnel and was washed several times with water. The title compound was extracted with methylene chloride and dried over magnesium sulphate, filtered and evaporated to dryness. The pale yellow liquid was then dried and stored in a vacuum desiccator, in which it crystallized (8.93 g, 95%). Melting point 29-30°C. Infrared (KBr): 3639w, 3566w, 3111,w 3064w, 2968s, 2940m, 2880m, 2387w, 2234w, 2194w, 2134w, 1931w, 1846w, 1799w, 1611m, 1505w, 1465m, 1437m, 1403w, 1348s, 1271m, 1194s, 1139s, 1057s, 1003w, 951w, 882w, 788s, 777s, 751m, 740m, 653m, 616s cm-1. 1Hnmr (d6-DMSO):  0.91-0.96 (t, 3H, CH3), 1.32-1.45 (sex, 2H, CH2), 1.96-2.06 (quin, 2H, CH2), 4.61 (s, 3H, N-CH3), 4.98-5.02 (t, 2H, N-CH2), 7.96-8.02 (m, 2H, CH), 8.32-8.43 (m, 2H, CH). 13Cnmr (d6-DMSO):  12.7 (CH3), 18.4 (CH2), 30.0 (CH2) 37.2 (N-CH3), 50.3 (N-CH2), 113.2 (CH), 113.6 (CH), 130.3 (CH), 130.4 (CH), Quaternary carbons not observed. ES-MS: ES+ *m/z* 189.9 Bt14+. ES- *m/z* 279.9 N(CF3SO2)2-.

*1-butyl-3-methylbenzotriazolium methanesulfonate**Bt14Mes*

1-butyl-3-methylbenzotriazolium iodide (6.34 g, 0.02 mol) was converted to the hydroxide using an ion-exchange column. The aqueous hydroxide solution was neutralised with methane sulphonic acid and the water removed. The residue was dissolved in methylene chloride and dried over sodium carbonate, filtered and evaporated to dryness. The product was dried and stored in a vacuum desiccator (4.8 g, 84%). Melting point ~57°C. Infrared (nujol): 3422m br, 3103w, 2925s, 2854s, 2235m, 2135m, 1995w, 1654m, 1609m, 1460 ms, 1376m, 1348w, 1194w, 1061w, 1042w, 776m cm-1. 1Hnmr (d6-DMSO):  0.91-0.96 (t, 3H, CH3), 1.32-1.44 (sex, 2H, CH2), 1.98-2.08 (quin, 2H, CH2), 2.31 (s, 3H, S-CH3), 4.61 (s, 3H, N-CH3), 4.98-5.03 (t, 2H, N-CH2), 7.97-7.99 (m, 2H, CH), 8.34-8.44 (m, 2H, CH). 13Cnmr (d6-DMSO):  12.7 (CH3), 18.4 (CH2), 29.9 (CH2), 37.3 (N-CH3), 39.0 (S-CH3), 50.3 (N-CH2), 113.2 (CH), 113.6 (CH), 130.3 (2xCH), Quaternary carbons not observed. ES-MS: ES+ *m/z* 189.8 Bt14+. ES- *m/z* 94.5 CH3SO3-.

*1-butyl-3-methylbenzotriazolium p-toluenesulfonate**Bt14Tos*

1-butyl-3-methylbenzotriazolium iodide (6.34 g, 0.02 mol) was converted to the hydroxide in an analogous proceedure to the above. The hydroxide solution was then neutralised with *p*-toluenesulphonic acid. The white solid was dried and stored in a vacuum desiccator (6.35 g, 88%). Melting point 120°C. Infrared (KBr): 3423w, 2925s, 2855s, 1995w, 1654w, 1605w, 1491w, 1460m, 1403w, 1376m, 1350m, 1284w, 1199m, 1074w, 1054w, 1031m, 1007m, 849w, 823w, 781m, 711w, 679m cm-1. 1Hnmr (d6-DMSO):  0.96-1.00 (t, 3H, CH3), 1.41-1.48 (sex, 2H, CH2), 2.05-2.18 (quin, 2H, CH2), 2.31 (s, 3H, Ph-CH3), 4.71 (s, 3H, N-CH3), 4.96-4.98 (t, 2H, N-CH2), 7.04-7.07 (d, 2H, CH), 7.59-7.62 (d, 2H, CH), 7.80-7.83 (m, 2H, CH), 8.10-8.16 (m, 1H, CH), 8.29-8.34 (m, 1H, CH). 13Cnmr (d6-DMSO):  12.7 (CH3), 18.4 (CH2), 20.1 (CH3), 30.0 (CH2), 37.3 (CH3), 50.3 (CH2), 113.2 (CH), 113.6 (CH), 124.9 (2xCH), 127.5 (2xCH), 130.3 (2xCH), Quaternary carbons not observed. ES-MS: ES+ *m/z* 189.9 Bt14+. ES- *m/z* 170.6 CH3PhSO3-.

*1-benzyl-3-methylbenzotriazolium dicyanamide**Bt1BnN(CN)2*

The title compound was prepared using the same method described for Bt14N(CN)2. Infrared (KBr): Infrared (Neat): 3484br, 3100m, 3064m, 3009s, 2694w, 2546w, 2363w, 2237s, 2192s, 2143s, 1995w, 1819w, 1609m, 1587w, 1496m, 1473s, 1456s, 1400m, 1366m, 1309m, 1273m, 1203m, 1182m, 1141m, 1087m, 1016m, 1002w, 953w, 904m, 846w, 796m, 776m, 754m, 705m, 674w, 639w cm-1. 1Hnmr (d6-DMSO):  4.62 (s, 3H, N-CH3), 6.30 (s, 2H, N-CH2), 7.40-7.47 (m, 3H, CH), 7.52-7.56 (m, 2H, CH), 7.96-8.02 (m, 2H, CH), 8.33-8.40 (m, 2H, CH). 13Cnmr (d6-DMSO):  37.5 (N-CH3), 53.7 (N-CH2), 113.1 (CH), 113.8 (CH), 128.2 (CH), 128.5 (CH), 128.6 (CH), 130.3 (CH), 130.7 (CH), Quaternary carbons not observed. ES-MS: ES+ *m/z* 224 Bt1bn+. ES- *m/z* 65 N(CN)2-

*1-benzyl-3-methylbenzotriazolium bis(trifluoromethane)sulfonamide Bt1BnNtf2*

# The title compound was prepared using the same method described for Bt14Ntf2. Melting point 69°C. Infrared (KBr): 3422w, 3110w, 2925s, 2854s, 2723w, 2136w, 1794w, 1612w, 1499w, 1459s, 1376m, 1351m, 1330m, 1318w, 1274w, 1197m, 1134w, 1053m, 1013w, 846w, 823w, 795w, 779w, 756m, 748m, 738m, 705m, 671w, 616s cm-1. 1Hnmr (d6-DMSO):  4.62 (s, 3H, N-CH3), 6.30 (s, 2H, N-CH2), 7.40-7.47 (m, 3H, CH), 7.51-7.55 (m, 2H, CH), 7.96-8.02 (m, 2H, CH), 8.32-8.40 (m, 2H, CH). 13Cnmr (d6-DMSO):  37.5 (N-CH3), 53.7 (N-CH2), 113.1 (CH), 113.8 (CH), 128.2 (CH), 128.5 (CH), 128.6 (CH), 130.3 (CH), 130.7 (CH), Quaternary carbons not observed. ES-MS: ES+ *m/z* 224 Bt1Bn+. ES- *m/z* 280 N(CF3SO2)2-.

*1-benzyl-3-methylbenzotriazolium methanesulfonate**Bt1BnMes*

# The title compound was prepared using the same method described for Bt14Mes. Melting point ~92°C. Infrared (KBr): 3432m br, 3103w, 2926s, 2854s, 2235m, 2135m, 1995w, 1654m, 1609m, 1461ms, 1377m, 1348w, 1194w, 1061w, 1042w, 776m cm-1. 1Hnmr (d6-DMSO):  2.32 (s, 3H, CH3SO3), 4.62 (s, 3H, N-CH3), 6.30 (s, 2H, N-CH2), 7.38-7.47 (m, 3H, CH), 7.52-7.56 (m, 2H, CH), 7.96-8.02 (m, 2H, CH), 8.33-8.40 (m, 2H, CH). 13Cnmr (d6-DMSO):  36.5 (CH3-SO3), 38.85 (N-CH3), 53.7 (N-CH2), 113.1 (CH), 113.8 (CH), 128.2 (CH), 128.5 (CH), 128.6 (CH), 130.3 (CH), 130.7 (CH), Quaternary carbons not observed. ES-MS: ES+ *m/z* 224 Bt1Bn+. ES- *m/z* 94.6 CH3SO3-.

*1-benzyl-3-methylbenzotriazolium p-toluenesulfonate Bt1BnTos*

The title compound was prepared using the same method described for Bt14Tos. Melting point 143°C. Infrared (KBr): 3433w, 2925s, 2855s, 1996w, 1654w, 1604w, 1481w, 1460m, 1413w, 1376m, 1350m, 1284w, 1199m, 1075w, 1054w, 1031m, 1007m, 849w, 823w, 781m, 711w, 679m cm-1.1Hnmr (d6-DMSO):  2.31 (s, 3H, Ph-CH3), 4.63 (s, 3H, N-CH3), 6.32 (s, 2H, N-CH2), 7.04-7.07 (d, 2H, CH), 7.37-7.47 (m, 3H, CH), 7.52-7.56 (m, 2H, CH), 7.59-7.62 (d, 2H, CH), 7.80-7.83 (m, 2H, CH), 7.96-8.02 (m, 2H, CH), 8.35-8.42 (m, 2H, CH). 13CNMR(d6-DMSO):  20.4 (CH3), 37.5 (CH3), 53.7 (CH2), 113.2 (CH), 113.8 (CH), 124.9 (2xCH), 127.5 (2xCH), 128.3 (2xCH), 128.5 (3xCH), 130.3 (CH), 130.7 (CH), Quaternary carbons not observed. ES MS: ES+ *m/z* 224 Bt1Bn+. ES- *m/z* 171 CH3PhSO3-.
